# Supplementary material
Source: HighWire-hosted journal article supplement (https://bjgp.org/highwire/filestream/44554/field_highwire_adjunct_files/0/BJGP.2021.0547_suppl.pdf)
Supplement: BJGP.2021.0547_suppl.pdf [file BJGP.2021.0547_suppl.pdf]

## Supplementary data 1: Sex stratified results

**Table S1**

Association between hip pain and definite radiographic hip OA stratified to sex

| <b>Analyses</b>   | <b>Study group</b>  | <b>Prevalence<br/>K&amp;L<math>\geq</math>2 in<br/>study group</b> | <b>Control group</b>    | <b>Prevalence<br/>K&amp;L<math>\geq</math>2 in<br/>control group</b> | <b>OR [95% CI]</b>   |
|-------------------|---------------------|--------------------------------------------------------------------|-------------------------|----------------------------------------------------------------------|----------------------|
| Men<br>(n=418)    | All painful<br>hips | 41/154<br>(26.6%)                                                  | All pain-free<br>hips   | 46/264<br>(17.4%)                                                    | 1.74<br>[1.06, 2.87] |
| Women<br>(n=1564) | All painful<br>hips | 64/635<br>(10.1%)                                                  | Bilateral pain-<br>free | 67/929<br>(7.2%)                                                     | 1.48<br>[1.06, 2.06] |

**Table S2**

Association between hip pain and definite radiographic hip OA stratified to sex

| <b>Analyses</b>   | <b>Study group</b>  | <b>Prevalence<br/>K&amp;L<math>\geq</math>1 in<br/>study group</b> | <b>Control group</b>    | <b>Prevalence<br/>K&amp;L<math>\geq</math>1 in<br/>control group</b> | <b>OR [95% CI]</b>   |
|-------------------|---------------------|--------------------------------------------------------------------|-------------------------|----------------------------------------------------------------------|----------------------|
| Men<br>(n=418)    | All painful<br>hips | 94/154<br>(61.0%)                                                  | All pain-free<br>hips   | 110/264<br>(41.7%)                                                   | 1.78<br>[1.23, 2.59] |
| Women<br>(n=1564) | All painful<br>hips | 231/635<br>(36.4%)                                                 | Bilateral pain-<br>free | 265/929<br>(28.5%)                                                   | 1.44<br>[1.18, 1.75] |

**Table S3**

Z-test statistics and significance value of the difference between sexes in the association between hip pain and radiographic hip OA

| <b>Analysis</b>                                               | <b>Z-test statistic</b> | <b>P-value</b> |
|---------------------------------------------------------------|-------------------------|----------------|
| <b>Association hip pain<br/>and K&amp;L<math>\geq</math>2</b> | -0.53995                | 0.295          |
| <b>Association hip pain<br/>and K&amp;L<math>\geq</math>1</b> | -1.23986                | 0.107          |
